# Supplementary material
Source: Springer Nature journal article supplement (https://www.springermedizin.de/resource/supplementary/12943_2005_130_MOESM5_ESM.pdf/9553514)

C 4d

TPA 4d

SB 233580 4d

SB 202474 4d

C 4d + TPA 6h

SB 233580 4d + TPA 6h

SB 202474 4d + TPA 6h

SB 233580 1h + TPA 4d

SB 202474 1h + TPA 4d

Myogenin

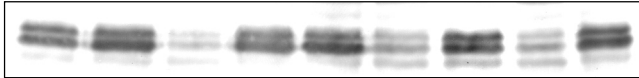

$\alpha$ -tubulin

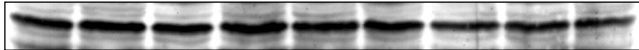

Supplement: MOESM5 [file 9553514]
